# Supplementary material for: An Image-Analysis-Based Method for the Prediction of Recombinant Protein Fiber Tensile Strength
Source: MDPI journal article supplement (doi:10.3390/ma15030708), 2022-01-18
Supplement: s1 [file s1]

Supplementary material for

## An Image Analysis-Based Method for Prediction of Recombinant Protein Fiber Tensile Strength

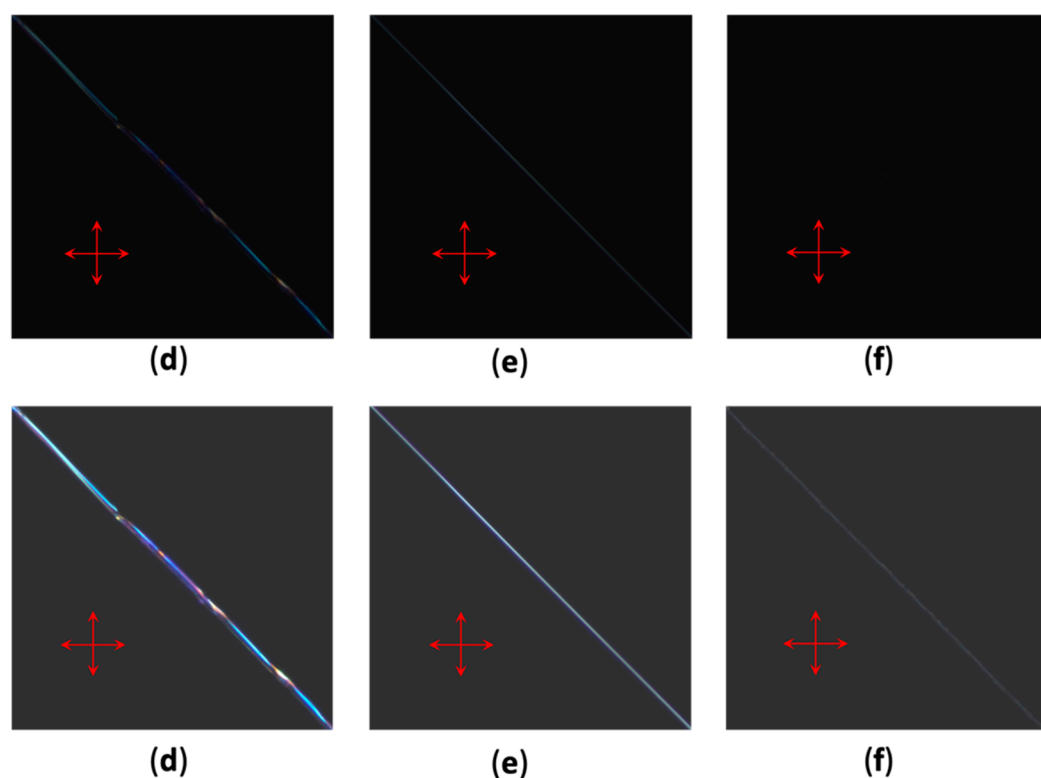

**Figure S1.** Images captured before and after increasing brightness and contrast for improved visualization. The three micrographs (d, e and f) were first saved as a single image after which the operation was performed on the image using the GIMP 2.0 software [76].

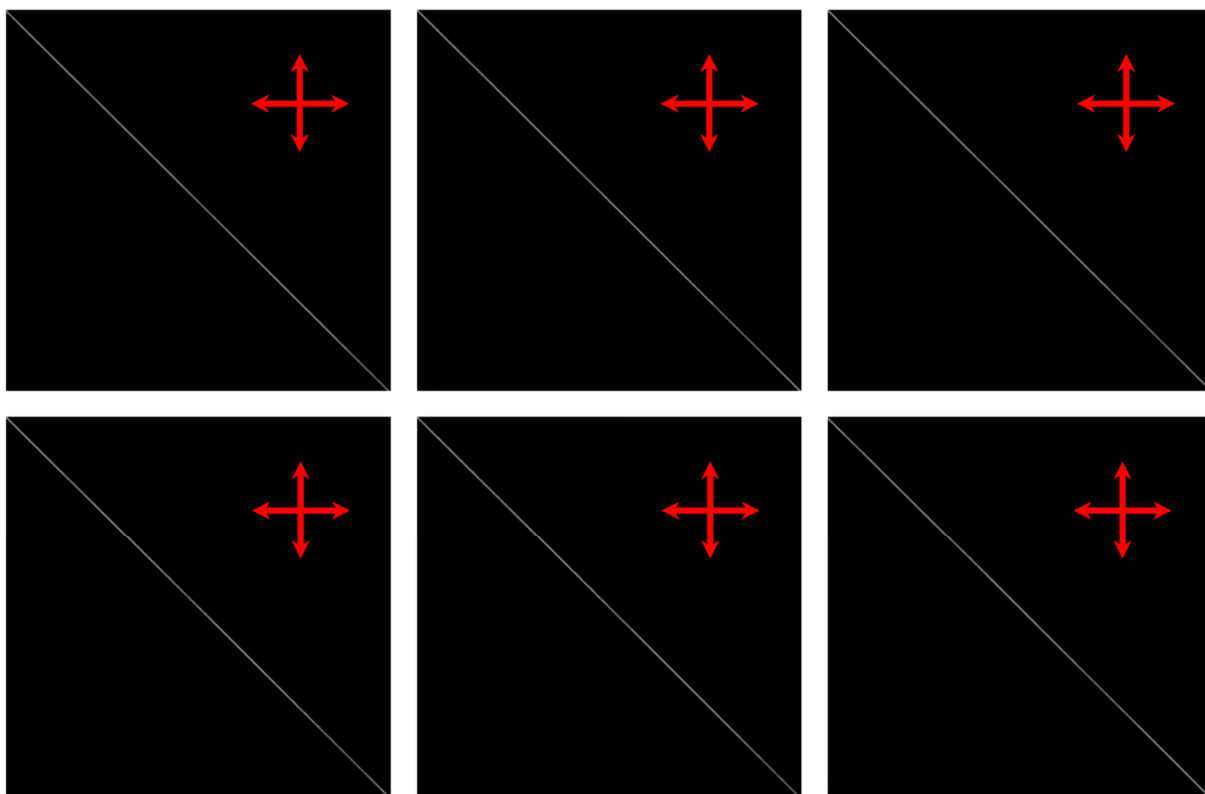

**Figure S2.** Sequential non overlapping gray scale POM images of the fiber from figure 2 b. Direction of polarizers indicated by red double arrows. Images captured using Setup 1 at 10 X magnification.

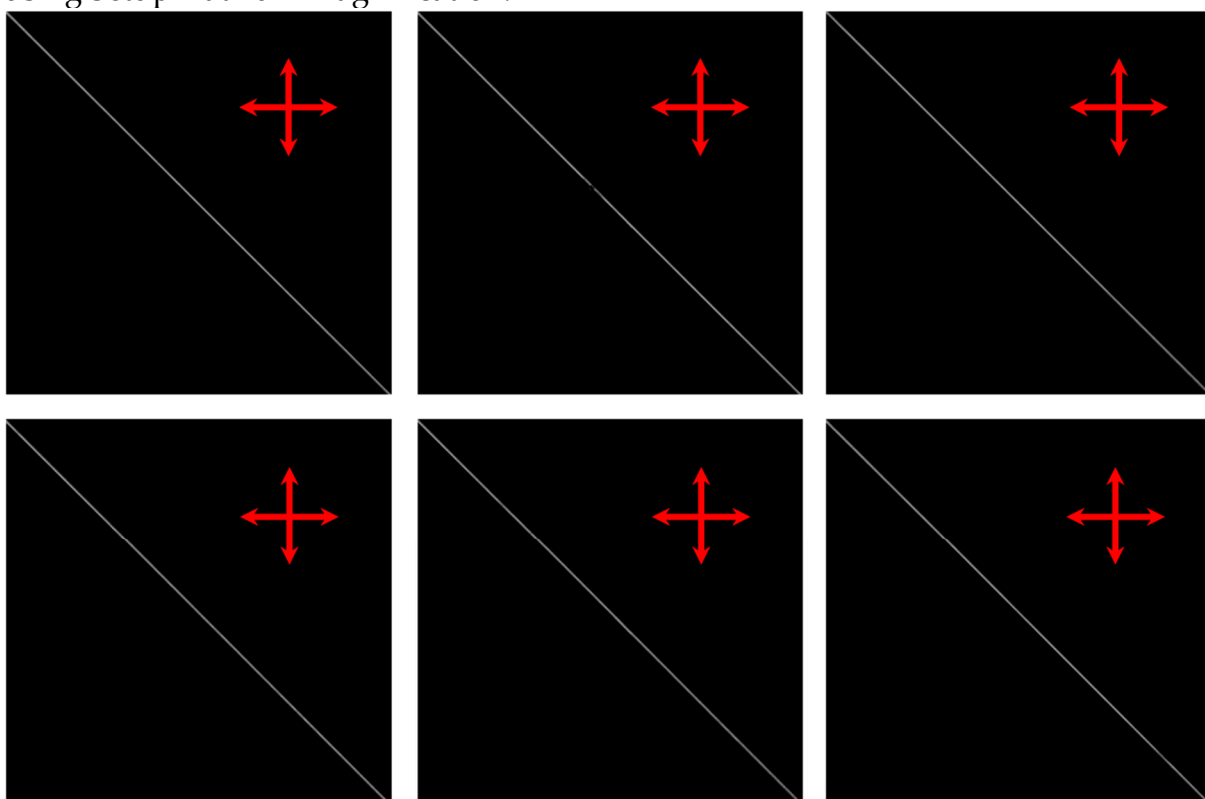

**Figure S3.** Sequential non overlapping gray scale POM images of the fiber from figure 2 c. Direction of polarizers indicated by red double arrows. Images captured using Setup 1 at 10 X magnification.

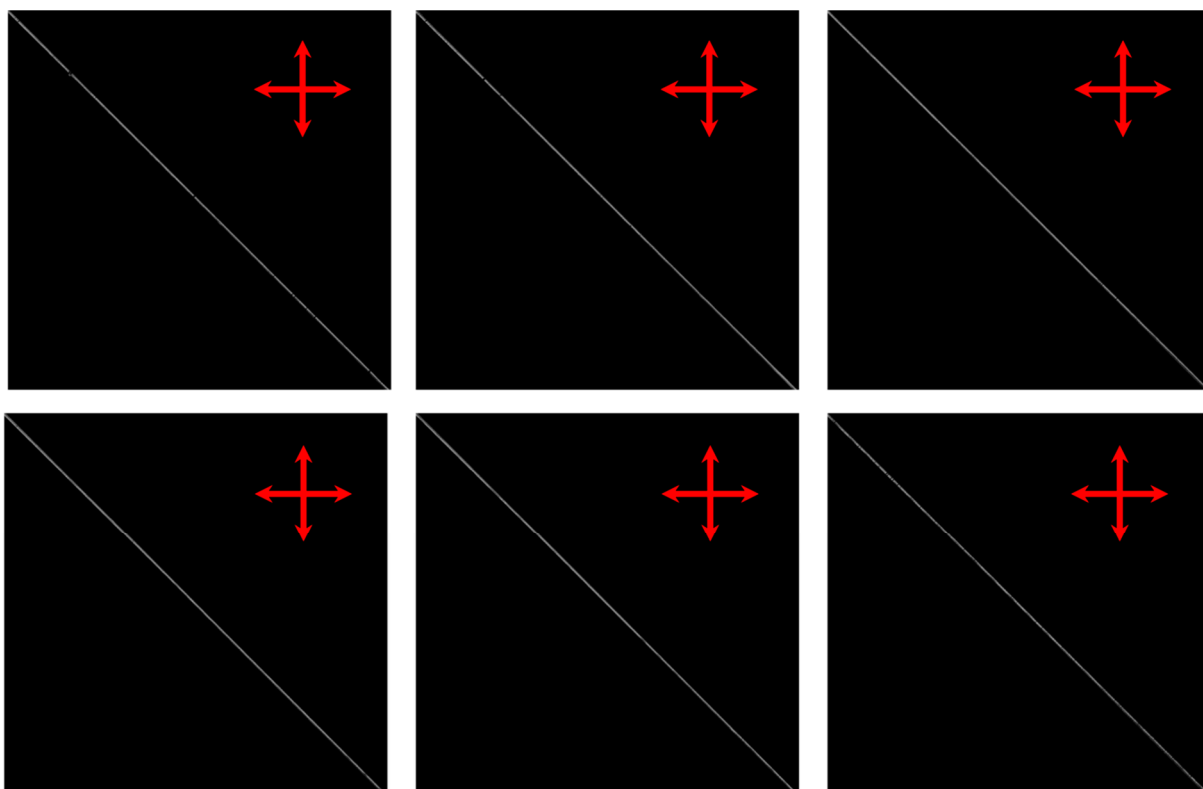

**Figure S4.** Sequential non overlapping gray scale POM images of the fiber from figure 2 d. Direction of polarizers indicated by red double arrows. Images captured using Setup 1 at 10 X magnification.

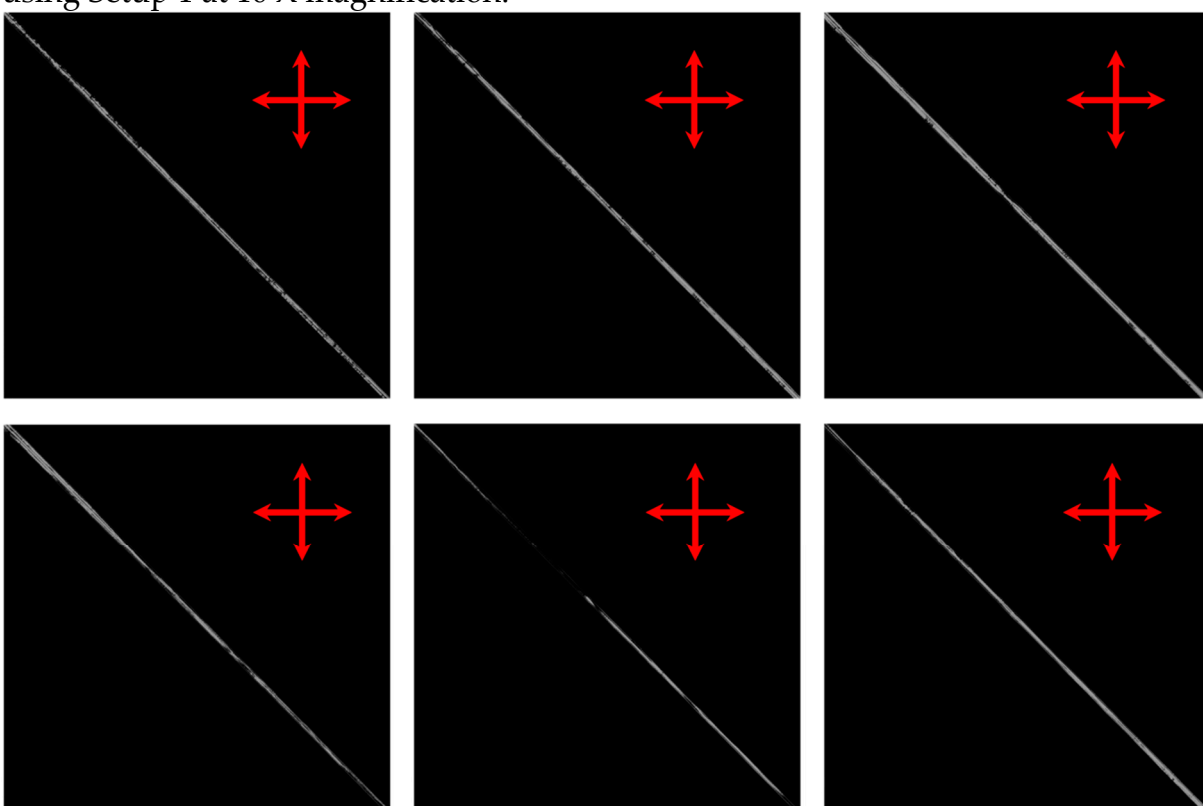

**Figure S5.** Sequential non overlapping gray scale POM images of the fiber from figure 2 e. Direction of polarizers indicated by red double arrows. Images captured using Setup 1 at 10 X magnification.

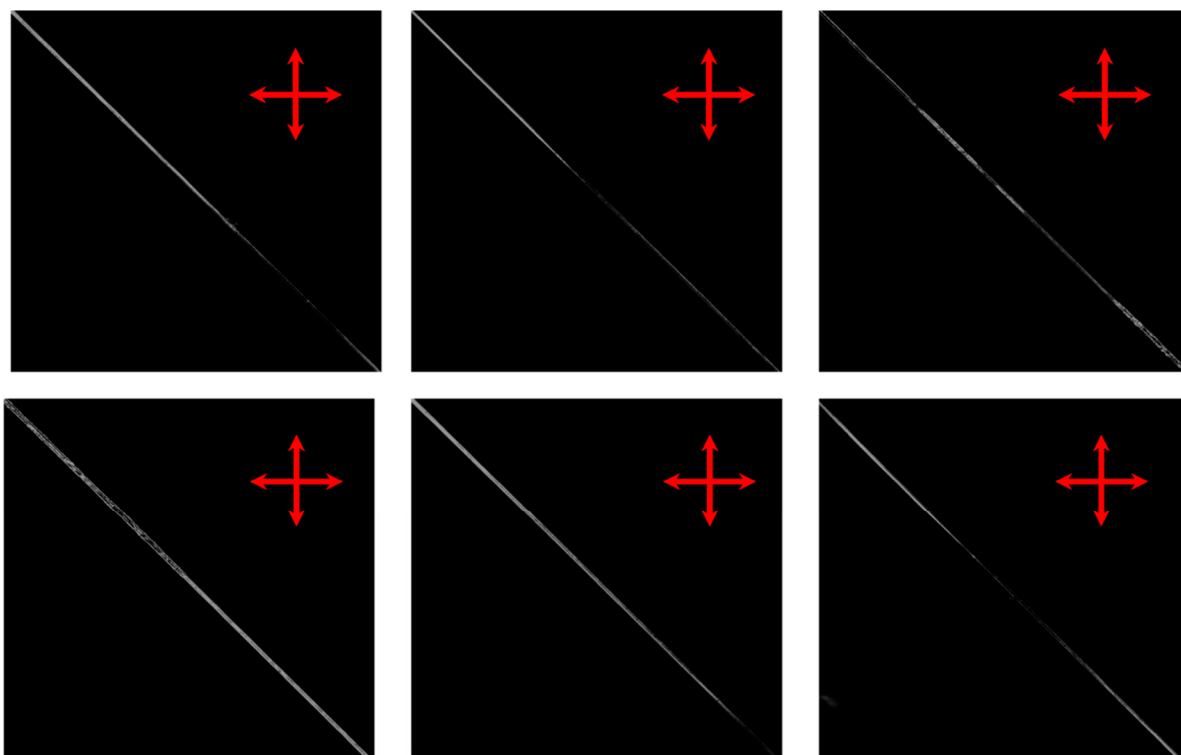

**Figure S6.** Sequential non overlapping gray scale POM images of the fiber from figure 2 f. Direction of polarizers indicated by red double arrows. Images captured using Setup 1 at 10 X magnification.

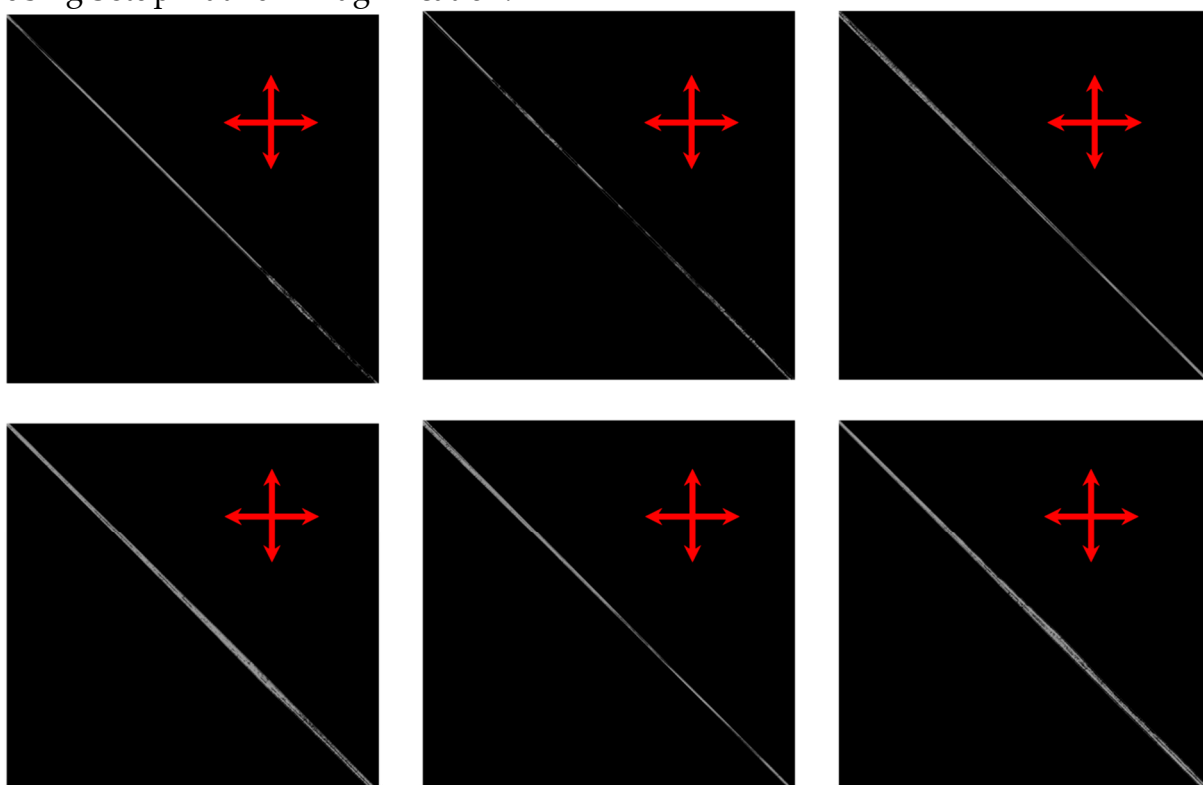

**Figure S7.** Sequential non overlapping gray scale POM images of the fiber from figure 2 g. Direction of polarizers indicated by red double arrows. Images captured using Setup 1 at 10 X magnification.

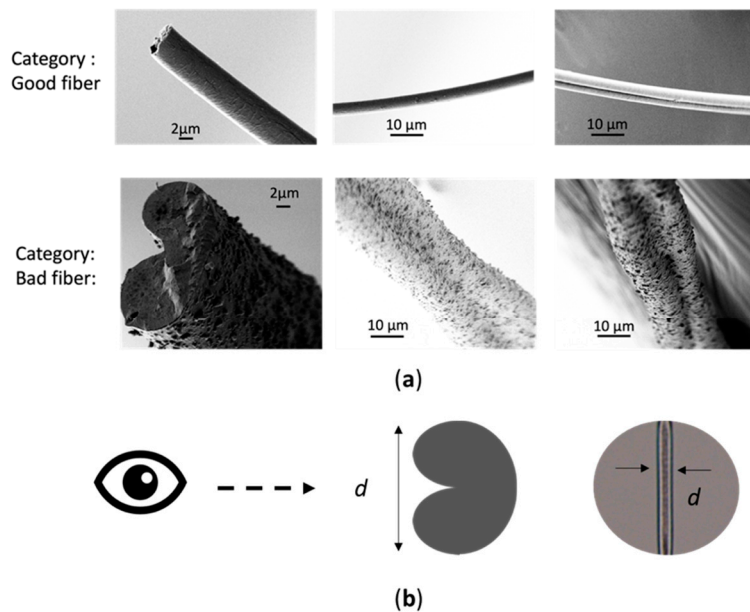

**Figure S8.** Representative SEM images and schematic drawing of NT2repCt fibers diameter measurement. (a) Representative SEM images of fibers sorted as good and bad. (b) Schematic drawing of measuring a fiber cross section maximum diameter with a light microscope.

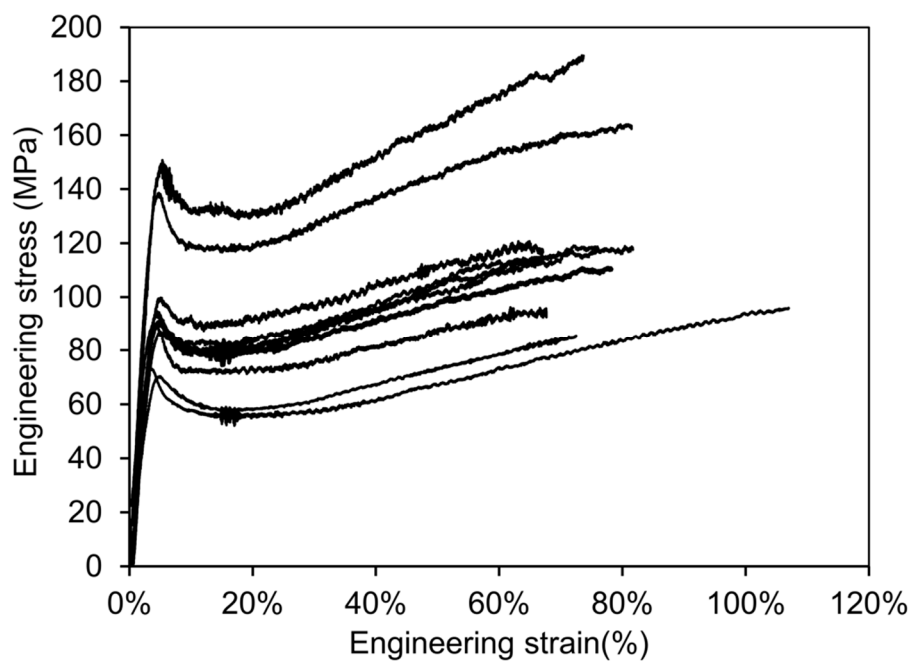

**Figure S9.** Representative engineering stress-strain curves.

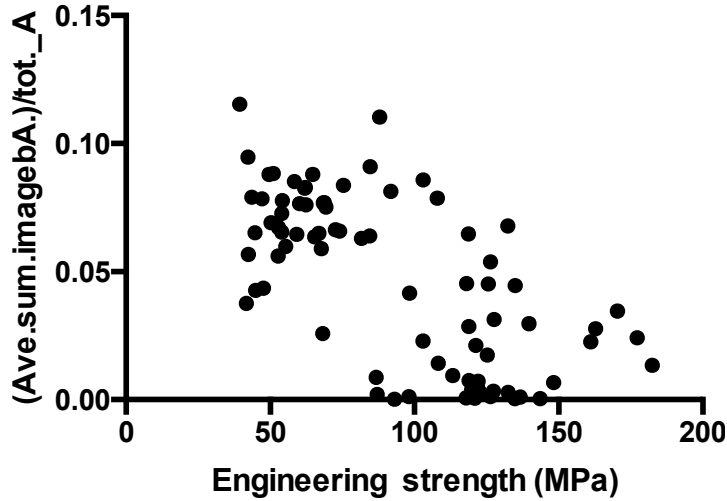

**Figure S10.** Scatter plot of the bright area parameter that yielded the highest correlation when plotted against measured engineering strength. ( $|r| = 0,66$ )

**Table S1.** Absolute values of the Pearson correlation coefficient  $r$  for bright area parameters for the fibers underlying figure 4a

| Parameter                 | Correlation coefficient $ r $ |
|---------------------------|-------------------------------|
| ave._bA/tot._A            | 0.61                          |
| Gmax._bA/tot._A           | 0.52                          |
| (Ave.max.bA)/tot._A       | 0.47                          |
| (Ave.sum.imagebA.)/tot._A | 0.66                          |
| tot.bA/tot.A              | 0.61                          |

**ave.\_bA/tot.\_A:** the average bright area identified from POM fiber images relative to the total fiber area identified from brightfield images

**Gmax.\_bA/tot.\_A:** the global maximum bright area identified from POM fiber images relative to the total fiber area identified from brightfield images

**(Ave.max.bA)/tot.\_A:** = the average of (the maximum bright area of each individual POM fiber image) relative to the total fiber area identified from brightfield images

**(Ave.sum.imagebA.)/tot.\_A:** average (sum of total bright area of each individual POM fiber image) relative to the total fiber area identified from brightfield images

**tot.bA/tot.A:** the total bright area identified from POM fiber images relative to the total fiber area identified from brightfield images

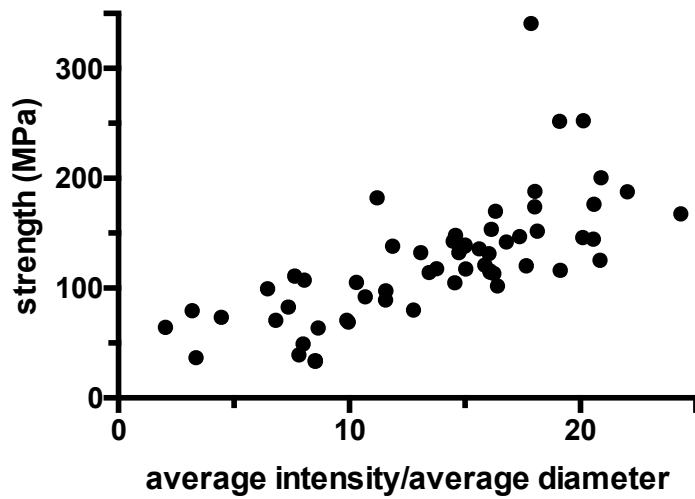

**Figure S11.** Average intensity over average diameter plotted against engineering strength for an extra set of fibers using setup 2. Pearson correlation coefficient  $r = 0.70$

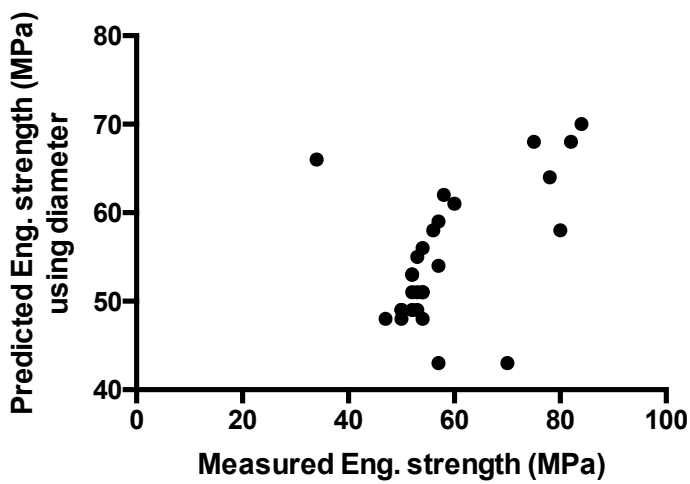

**Figure S12.** The predicted strength based only on diameter plotted against measured strength. Pearson correlation coefficient  $r = 0.50$

**Table S2.** Predicted values and the corresponding measured engineering tensile strength values of figure 4b-c.

| Measured Eng. strength (MPa) | Predicted Eng. strength (MPa) |
|------------------------------|-------------------------------|
| 54.14                        | 47.80084                      |
| 49.97                        | 43.98664                      |
| 56.63                        | 54.70787                      |
| 50.34                        | 45.76067                      |
| 53.74                        | 43.80034                      |
| 52.38                        | 44.26527                      |
| 80.34                        | 57.09075                      |
| 52.63                        | 44.79338                      |
| 52.47                        | 49.63588                      |
| 54.14                        | 46.415                        |
| 52.54                        | 43.92113                      |
| 34.42                        | 51.85962                      |
| 50.27                        | 43.83798                      |
| 56.91                        | 42.25412                      |
| 51.58                        | 48.90983                      |
| 77.93                        | 70.27099                      |
| 84.31                        | 77.67467                      |
| 81.98                        | 73.49686                      |
| 51.64                        | 47.08956                      |
| 47.14                        | 44.39293                      |
| 54.44                        | 49.99828                      |
| 55.82                        | 50.32406                      |
| 53                           | 49.48837                      |
| 70.21                        | 81.11977                      |
| 60.06                        | 60.26598                      |
| 74.86                        | 73.12772                      |
| 57.01                        | 52.40215                      |
| 57.71                        | 54.01012                      |
